# Supplementary material for: Throughfall isotopic composition in relation to drop size at the intra-event scale in a Mediterranean Scots pine stand
Source: Copernicus journal article supplement (doi:10.5194/hess-24-4675-2020), 2020-09-28
Supplement: Supplementary file 1 [file hess-24-4675-2020-supplement.pdf]

Supplement of Hydrol. Earth Syst. Sci., 24, 4675–4690, 2020  
<https://doi.org/10.5194/hess-24-4675-2020-supplement>  
© Author(s) 2020. This work is distributed under  
the Creative Commons Attribution 4.0 License.

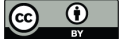

*Supplement of*

## **Throughfall isotopic composition in relation to drop size at the intra-event scale in a Mediterranean Scots pine stand**

**Juan Pinos et al.**

*Correspondence to:* Pilar Llorens ([pilar.llorens@idaea.csic.es](mailto:pilar.llorens@idaea.csic.es))

The copyright of individual parts of the supplement might differ from the CC BY 4.0 License.

## Supplementary material

**Table S1.** Meteorological characteristics and isotopic composition of open rainfall and throughfall for the 21 events during the study period, May 2018 to July 2019.

| Date             | Rainfall class | Rainfall (mm) | Throughfall (mm) | Rainfall duration (h) | Max 30-min rainfall intensity (mm h <sup>-1</sup> ) | Samples | Mean weighed rainfall $\delta^{18}\text{O}$ (‰) (mean $\pm$ SD) | Mean weighed throughfall $\delta^{18}\text{O}$ (‰) (mean $\pm$ SD) |
|------------------|----------------|---------------|------------------|-----------------------|-----------------------------------------------------|---------|-----------------------------------------------------------------|--------------------------------------------------------------------|
| 12 May 2018      | L-H            | 52.5          | 48.3             | 9.8                   | 19.9                                                | 10      | -4.95 $\pm$ 0.17                                                | -4.67 $\pm$ 0.17                                                   |
| 19 May 2018      | S-L            | 12.5          | 10.7             | 6.6                   | 7.8                                                 | 3       | -5.26 $\pm$ 0.59                                                | -5.31 $\pm$ 0.88                                                   |
| 28 May 2018      | L-L            | 37.4          | 33.2             | 50.8                  | 6.2                                                 | 7       | -6.18 $\pm$ 0.21                                                | -6.08 $\pm$ 0.28                                                   |
| 1 June 2018      | L-H            | 26.9          | 20.3             | 9.8                   | 25.4                                                | 5       | -7.34 $\pm$ 0.72                                                | -6.83 $\pm$ 0.47                                                   |
| 6 June 2018      | S-H            | 26.9          | 25.7             | 5.8                   | 18.3                                                | 5       | -8.55 $\pm$ 0.41                                                | -8.34 $\pm$ 0.67                                                   |
| 10 June 2018     | S-L            | 7.8           | 5.4              | 3.0                   | 5.9                                                 | 2       | -6.84 $\pm$ 3.82                                                | -5.34 $\pm$ 1.66                                                   |
| 23 June 2018     | S-H            | 20.5          | 18.6             | 3.3                   | 38.2                                                | 4       | -3.67 $\pm$ 0.34                                                | -3.51 $\pm$ 0.44                                                   |
| 28 June 2018     | L-H            | 34.3          | 33.6             | 9.2                   | 21.8                                                | 7       | -6.46 $\pm$ 0.28                                                | -5.96 $\pm$ 0.32                                                   |
| 11 July 2018     | S-H            | 12.5          | 8.6              | 2.8                   | 16.4                                                | 2       | -6.37 $\pm$ 2.79                                                | -6.41 $\pm$ 2.63                                                   |
| 9 August 2018    | L-H            | 39.4          | 37.6             | 20.6                  | 11.7                                                | 7       | -4.06 $\pm$ 0.20                                                | -4.08 $\pm$ 0.29                                                   |
| 12 August 2018   | S-H            | 16.8          | 14.0             | 5.4                   | 19.9                                                | 4       | -4.76 $\pm$ 0.75                                                | -4.71 $\pm$ 0.92                                                   |
| 23 August 2018   | S-L            | 6.0           | 3.8              | 3.3                   | 8.2                                                 | 2       | -3.98 $\pm$ 1.01                                                | -4.50 $\pm$ 0.81                                                   |
| 3 September 2018 | S-H            | 32.8          | 28.6             | 3.1                   | 17.6                                                | 6       | -4.19 $\pm$ 0.34                                                | -4.07 $\pm$ 0.27                                                   |
| 9 October 2018   | L-L            | 34.3          | 31.1             | 13.2                  | 8.6                                                 | 7       | -11.75 $\pm$ 0.29                                               | -11.41 $\pm$ 0.47                                                  |
| 2 April 2019     | L-L            | 13.5          | 12.5             | 23.6                  | 2.7                                                 | 3       | -5.98 $\pm$ 0.41                                                | -5.60 $\pm$ 0.57                                                   |
| 1 May 2019       | L-L            | 27.9          | 23.8             | 43.8                  | 5.1                                                 | 6       | -5.29 $\pm$ 0.37                                                | -4.52 $\pm$ 0.34                                                   |
| 20 May 2019      | S-L            | 8.8           | 6.9              | 7.0                   | 5.1                                                 | 2       | -6.43 $\pm$ 0.03                                                | -6.16 $\pm$ 1.17                                                   |
| 24 May 2019      | L-L            | 18.7          | 16.9             | 12.7                  | 5.1                                                 | 4       | -4.59 $\pm$ 0.41                                                | -3.86 $\pm$ 0.42                                                   |
| 11 June 2019     | L-L            | 32.6          | 33.0             | 16.2                  | 5.9                                                 | 7       | -7.61 $\pm$ 0.12                                                | -7.11 $\pm$ 0.21                                                   |
| 14 July 2019     | S-L            | 7.6           | 5.6              | 1.8                   | 9.4                                                 | 2       | -3.12 $\pm$ 0.68                                                | -2.46 $\pm$ 0.29                                                   |
| 17 July 2019     | S-H            | 13.3          | 9.4              | 1.7                   | 15.2                                                | 3       | -5.86 $\pm$ 1.32                                                | -4.83 $\pm$ 0.79                                                   |

**Table S2.** Average percentage of throughfall types for each of the rainfall classes. SP: splash throughfall, FR: free throughfall, and DR: canopy drip.

10

| <b>Rainfall class</b> | <b>SP (%)</b> | <b>FR (%)</b> | <b>DR (%)</b> |
|-----------------------|---------------|---------------|---------------|
| L-H                   | 16.9          | 21.3          | 61.8          |
| S-L                   | 14.3          | 16.4          | 69.3          |
| S-H                   | 19.0          | 25.0          | 56.4          |
| L-L                   | 14.6          | 13.5          | 72.0          |

15

20

25

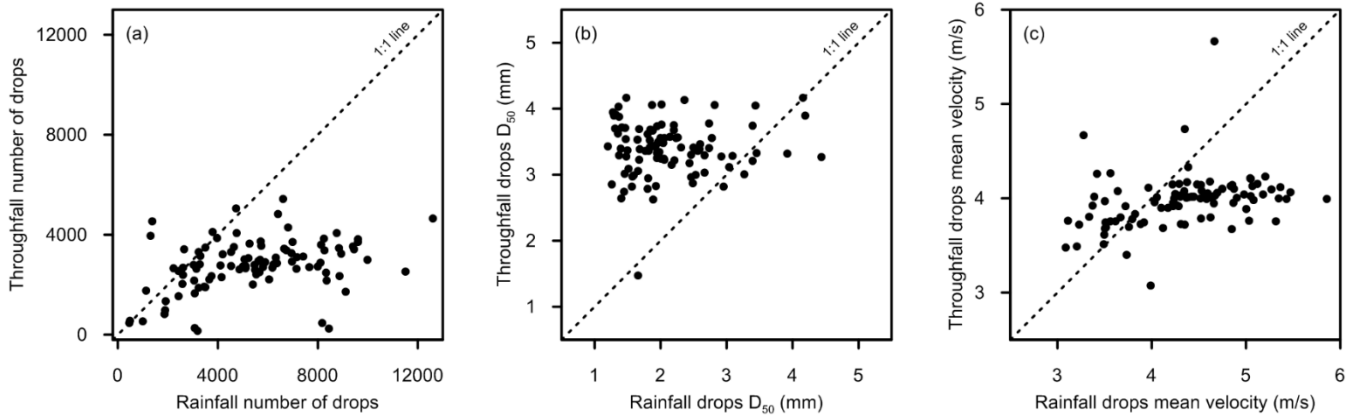

30 **Figure S1.** Relationship between open rainfall and throughfall for: (a) number of drops, (b) median volume drop diameter ( $D_{50}$ ) and (c) drops' mean velocity.

35

40

45

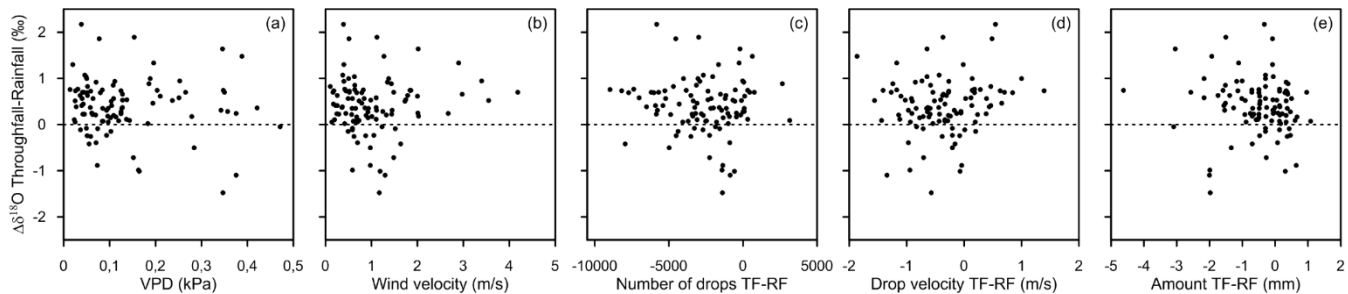

50 **Figure S2.** Isotopic shift variability ( $\delta^{18}\text{O}_{\text{TF-RF}}$ ) versus: (a) vapor pressure deficit, (b) mean wind velocity, (c) differences in number of drops, (d) differences in mean drop velocity and (e) differences in amount per sample.

55

60

65

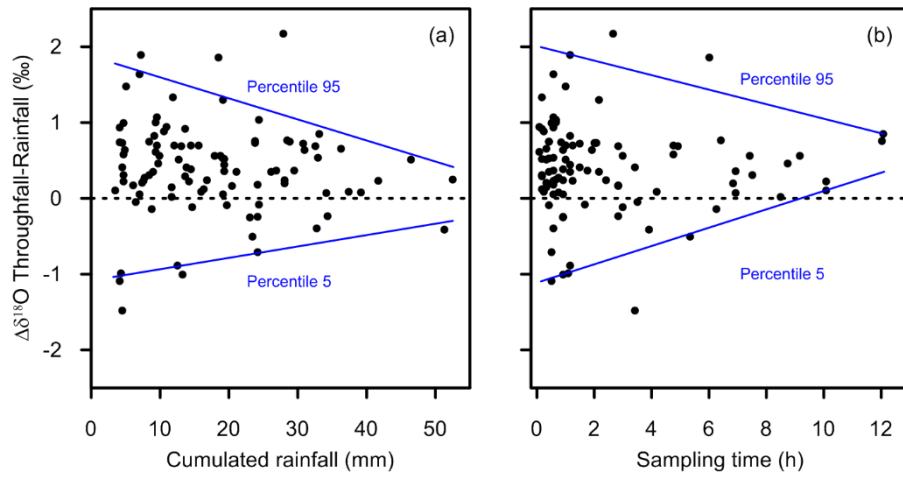

70 **Figure S3.** Isotopic shift variability ( $\delta^{18}\text{O}_{\text{TF-RF}}$ ) *versus*: (a) cumulative rainfall throughout the rainfall event and (b) sampling time (i.e. time each 5 mm sample took to be filled).

75

80

85
